# Supplementary material
Source: PubMed Central journal article supplement (PMC4548895)
Supplement: zsn999103864so1.pdf [file zsn999103864so1.pdf]

**Supplementary Table. Comparison between the excluded and the included subjects (using the dataset of original zoster study)**

| Variables                       | Excluded (n=95)      | Included(n=459)       | P value      |
|---------------------------------|----------------------|-----------------------|--------------|
| Age (years, median (IQR))       | 11.3(8.49-14.08)     | 10.3 (7.13-13.63)     | 0.071        |
| Male sex (%)                    | 47/95 (49.5)         | 216/459 (47.1)        | 0.668        |
| White (%)                       | 72/88 (81.8)         | 406/437 (92.9)        | <b>0.001</b> |
| Education (years, median (IQR)) | 14 (12-14)<br>(n=38) | 14 (12-14)<br>(n=213) | 0.691        |
| Parental history of asthma (%)  | 10/71 (14.1)         | 52/380 (13.7)         | 0.928        |
| Atopic dermatitis (%)           | 10/95 (10.5)         | 37/459 (8.1)          | 0.433        |
| Allergic rhinitis (%)           | 16/95 (16.8)         | 88/459 (19.2)         | 0.597        |
| Asthma by PAC (%)               | 16/95 (16.8)         | 82/459 (17.9)         | 0.812        |
